# Supplementary material for: Molecular and Genetic Bases of Fruit Firmness Variation in Blueberry&mdash;A Review
Source: Preprints.org preprint supplement (doi:10.20944/preprints201808.0089.v1), 2018-08-05
Supplement: Supplementary file 2 [file supplementary]

## Sheet: Master table
Vaccinium corymbosum – Southern Highbush
Cultivar	Result average	# of berries Phenotyped	Location	Reference	Notes	Firmtech v.	Realease Year
Abundance	230	25	Florida, USA	Rodríguez-Armenta et al. 2016	avgd from data	II	2006
Arcadia	179.826	variable	Florida, USA		University of Florida historical data	II	2015
Avanti	205.859	variable	Florida, USA		University of Florida historical data	II	2015
Avonblue	172.2	25-50	New Jersey, USA	Ehlenfeldt&Martin2002	sub-optimal climate	I	1977
Beaufort	166	NR	North Carolina, USA	Ballington and Rooks 2007 a	avgd from data	NR	2007
Bladen	184.7	25-50	New Jersey, USA	Ehlenfeldt&Martin2002	sub-optimal climate	I	1990
Blue Ridge	129.4	25-50	New Jersey, USA	Ehlenfeldt&Martin2002	sub-optimal climate	I	1987
Camelia	173	100	Georgia, USA	NeSmith and Draper 2007		II	2007
Cape Fear	131.5	25-50	New Jersey, USA	Ehlenfeldt&Martin2002	sub-optimal climate	I	1987
Carteret	131	NR	North Carolina, USA	Ballington and Rooks 2007 a	avgd from data	NR	2007
Chickadee	239.295	variable	Florida, USA		University of Florida historical data	II	2009
Cooper	174.5	25-50	New Jersey, USA	Ehlenfeldt&Martin2002	sub-optimal climate	I	1987
Emerald	193	50	Georgia, USA	Li et al. 2012		II	2001
Emerald	185.25	100	Florida, USA	Blaker et al. 2014	avgd from data	II	2001
Emerald	193.224	variable	Florida, USA		University of Florida historical data	II	1999
Endura	222.388	variable	Florida, USA		University of Florida historical data	II	2015
Farthing	220.5	100	Florida, USA	Blaker et al. 2014	avgd from data	II	2008
Farthing	259	150	Florida, USA	Yu et al. 2014		II	2008
Farthing	201	25	Florida, USA	Sargent et al. 2016		II	2008
Farthing	218.229	variable	Florida, USA		University of Florida historical data	II	2007
Flicker	199	25	Florida, USA	Blaker et al. 2014	avgd from data	II	2010
Flicker	193.169	variable	Florida, USA		University of Florida historical data	II	2009
Georgiagem	119.9	25-50	New Jersey, USA	Ehlenfeldt&Martin2002	sub-optimal climate	I	1987
Georgiagem	135	NR	Georgia, USA	NeSmith et al. 2014	hand harvested	II	1987
Georgiagem	116	NR	Georgia, USA	NeSmith et al. 2014	machine harvested	II	1987
Gulfcoast	153.5	25-50	New Jersey, USA	Ehlenfeldt&Martin2002	sub-optimal climate	I	1987
Indigocrisp	230.767	variable	Florida, USA		University of Florida historical data	II	2013
Jewel	157	50	Florida, USA	Blaker et al. 2014	avgd from data	II	2001
Jewel	174.126	variable	Florida, USA		University of Florida historical data	II	1998
Jubilee	138.1	25-50	New Jersey, USA	Ehlenfeldt&Martin2002	sub-optimal climate	I	1994
Keecrisp	253.655	variable	Florida, USA		University of Florida historical data	II	2016
Kestrel	324	25	Florida, USA	Blaker et al. 2014	avgd from data	II	2011
Kestrel	186.506	variable	Florida, USA		University of Florida historical data	II	2009
Lenoir	150	NR	North Carolina, USA	Ballington and Rooks 2007 a	avgd from data	NR	2003
Magnolia	146.1	25-50	New Jersey, USA	Ehlenfeldt&Martin2002	sub-optimal climate	I	1994
Magnus	190.836	variable	Florida, USA		University of Florida historical data	II	2017
Marimba	169	25-50	New Jersey, USA	Ehlenfeldt&Martin2002	sub-optimal climate	I	1992
Meadowlark	230	50	Florida, USA	Blaker et al. 2014	avgd from data	II	2010
Meadowlark	230.015	variable	Florida, USA		University of Florida historical data	II	2009
Millennia	167.5	50	Florida, USA	Blaker et al. 2014	avgd from data	II	2002
Misty	186.7	25-50	New Jersey, USA	Ehlenfeldt&Martin2002	sub-optimal climate	I	1989
New Hanover	161.6	NR	North Carolina, USA	Ballington and Rooks 2007 b	avgd from data	NR	2009
O’Neal	148.6	25-50	New Jersey, USA	Ehlenfeldt&Martin2002	sub-optimal climate	I	1987
O'Neal	167	100	Georgia, USA	NeSmith and Draper 2007		II	1987
O'Neal	183.5	20	Mississipi, USA	Stringer et al. 2013		II	1987
Optimus	219.75	variable	Florida, USA		University of Florida historical data	II	2017
Ozarkblue	153.2	25-50	New Jersey, USA	Ehlenfeldt&Martin2002	sub-optimal climate	I	1997
Palmetto	140	NR	Georgia, USA	NeSmith et al. 2014	hand harvested	II	2006
Palmetto	142	NR	Georgia, USA	NeSmith et al. 2014	machine harvested	II	2006
Pamlico	148	NR	North Carolina, USA	Ballington and Rooks 2007 a	avgd from data	NR	2003
Patrecia	219.472	variable	Florida, USA		University of Florida historical data	II	2016
Pearl River	189	25-50	New Jersey, USA	Ehlenfeldt&Martin2002	sub-optimal climate	I	1994
Pearl River	234.4	20	Mississipi, USA	Stringer et al. 2013		II	1994
Primadonna	154	50	Florida, USA	Blaker et al. 2014	avgd from data	II	2009
Primadonna	203.5	25	Florida, USA	Rodríguez-Armenta et al. 2016	avgd from data	II	2009
Primadonna	212.369	variable	Florida, USA		University of Florida historical data	II	2005
Raven	242.5	50	Florida, USA	Blaker et al. 2014	avgd from data	II	2010
Rebel	159.5	50	Florida, USA	Blaker et al. 2014	avgd from data	II	2007
Reveille	169.3	25-50	New Jersey, USA	Ehlenfeldt&Martin2002	sub-optimal climate	I	1990
Reveille	194.5	NR	North Carolina, USA	Ballington and Rooks 2007 a	avgd from data	NR	1990
Sampson	122.2	25-50	New Jersey, USA	Ehlenfeldt&Martin2002	sub-optimal climate	I	1998
Sampson	139.6	NR	North Carolina, USA	Ballington and Rooks 2007 b	avgd from data	NR	1998
SanJoaquin	194.692	variable	Florida, USA		University of Florida historical data	II	2007
Scintilla	206.5	50	Florida, USA	Blaker et al. 2014	avgd from data	II	2008
Scintilla	212	150	Florida, USA	Yu et al. 2014		II	2008
Scintilla	217.195	variable	Florida, USA		University of Florida historical data	II	2007
Sharpblue	143.3	25-50	New Jersey, USA	Ehlenfeldt&Martin2002	sub-optimal climate	I	1976
Sharpblue	181.588	variable	Florida, USA		University of Florida historical data	II	1975
Snowchaser	145.5	50	Florida, USA	Blaker et al. 2014	avgd from data	II	2008
Snowchaser	184.118	variable	Florida, USA		University of Florida historical data	II	2005
Southern Belle	178	25	Florida, USA	Rodríguez-Armenta et al. 2016	avgd from data	II	2003
Springhigh	150	50	Florida, USA	Blaker et al. 2014	avgd from data	II	2006
Springhigh	180.793	variable	Florida, USA		University of Florida historical data	II	2003
Star	155.9	25-50	New Jersey, USA	Ehlenfeldt&Martin2002	sub-optimal climate	I	1996
Star	182	100	Georgia, USA	NeSmith and Draper 2007		II	1996
Star	193.7	NR	Georgia, USA	NeSmith 2011		II	1996
Star	204.98		Florida, USA	Blaker and Olmstead 2012		II	1996
Star	177.6	20	Mississipi, USA	Stringer et al. 2013		II	1996
Star	213.953	variable	Florida, USA		University of Florida historical data	II	1995
Star	176.5	100	Florida, USA	Blaker et al. 2014	avgd from data	II	1996
Summit	154	25-50	New Jersey, USA	Ehlenfeldt&Martin2002	sub-optimal climate	I	1998
Suziblue	215	NR	Georgia, USA	NeSmith 2010		II	2010
Sweetcrisp	267	50	Georgia, USA	Li et al. 2011		II	2009
Sweetcrisp	228.71	25	Florida, USA	Blaker and Olmstead 2012		II	2009
Sweetcrisp	256.246	variable	Florida, USA		University of Florida historical data	II	2005
Sweetcrisp	305.5	100	Florida, USA	Blaker et al. 2014	avgd from data	II	2009
Sweetcrisp	261	150	Florida, USA	Yu et al. 2014		II	2009
Vireo	237.087	variable	Florida, USA		University of Florida historical data	II	2009
Wayne	177.949	variable	Florida, USA		University of Florida historical data	II	2017
Windsor	177.5	50	Florida, USA	Blaker et al. 2014	avgd from data	II	2002
Windsor	191	25	Florida, USA	Sargent et al. 2016		II	2002
Vaccinium corymbosum – Northern Highbush
Cultivar	Result average	# of berries Phenotyped	Location	Reference	Notes	Firmtech v.	Realease Year
Ama	130.2	25-50	New Jersey, USA	Ehlenfeldt&Martin2002		I
Angola	130	25-50	New Jersey, USA	Ehlenfeldt&Martin2002		I	1951
Atlantic	98.8	25-50	New Jersey, USA	Ehlenfeldt&Martin2002		I	1939
Aurora	148.7	7-10	Florida, USA	Yang et al. 2008		II	2004
Aurora	299	50	Michigan, USA	Lobos et al. 2014	multiple treatments, conv unit	II	2004
Aurora	215	NR	Oregon, USA	Yang et al. 2014	grafted on rootstock	II	2004
Aurora	158	25	Oregon, USA	Strik et al. 2017	organic production	II	2004
Berkeley	130.3	25-50	New Jersey, USA	Ehlenfeldt&Martin2002		I	1949
Berkeley	154	50	New Jersey, USA	Saftner et al. 2008		II	1949
Blue Ribbon	196	NR	Oregon, USA	Brazelton and Wagner 2014 b		NR	2014
Bluechip	132	25-50	New Jersey, USA	Ehlenfeldt&Martin2002		I	1979
Bluecrop	133.3	25-50	New Jersey, USA	Ehlenfeldt&Martin2002		I	1952
Bluecrop	149.4	7-10	Florida, USA	Yang et al. 2008		II	1952
Bluecrop	164	50	New Jersey, USA	Saftner et al. 2008		II	1952
Bluecrop	166	NR	New Zealand	Patel 2011		NR	1952
Bluecrop	153	25	Oregon, USA	Strik et al. 2017	organic production	II	1952
Bluegold	138.6	25-50	New Jersey, USA	Ehlenfeldt&Martin2002		I	1989
Bluegold	171	50	New Jersey, USA	Saftner et al. 2008		II	1989
Bluegold	173	25	Oregon, USA	Strik et al. 2017	organic production	II	1989
Bluehaven	161.4	25-50	New Jersey, USA	Ehlenfeldt&Martin2002	avgd from data	I	1967
Bluejay	121.5	25-50	New Jersey, USA	Ehlenfeldt&Martin2002		I	1978
Bluejay	154	25	Oregon, USA	Strik et al. 2017	organic production	II	1978
Blueray	125.9	25-50	New Jersey, USA	Ehlenfeldt&Martin2002		I	1955
Bluetta	127.2	25-50	New Jersey, USA	Ehlenfeldt&Martin2002		I	1967
Bonus	135.8	25-50	New Jersey, USA	Ehlenfeldt&Martin2002		I	NA
Bounty	142.1	25-50	New Jersey, USA	Ehlenfeldt&Martin2002		I	1987
Brigitta Blue	154.9	25	Chile	Lobos et al. 2016		II	1977
Brigitta Blue	159.7	25-50	New Jersey, USA	Ehlenfeldt&Martin2002	avgd from data	I	1977
Burlington	153.5	25-50	New Jersey, USA	Ehlenfeldt&Martin2002		I	1939
Burlington	109	25	Nova Scotia, Canada	Allan-Wojtas et al. 2001		I	1939
Cabot	103.1	25-50	New Jersey, USA	Ehlenfeldt&Martin2002		I	1920
Cargo	185.65	NR	Oregon, USA	Brazelton and Wagner 2014 a		NR	2014
Chandler	154	25-50	New Jersey, USA	Ehlenfeldt&Martin2002		I	1994
Chanticleer	135.5	25-50	New Jersey, USA	Ehlenfeldt&Martin2002		I	1997
Chanticleer	156	50	New Jersey, USA	Saftner et al. 2008		II	1997
Clockwork	208.75	NR	Oregon, USA	Brazelton and Wagner 2013		NR	2014
Coastal	137	50	New Jersey, USA	Saftner et al. 2008		II	not found
Collins	138.1	25-50	New Jersey, USA	Ehlenfeldt&Martin2002		I	1959
Concord	103.7	25-50	New Jersey, USA	Ehlenfeldt&Martin2002		I	1928
Coville	154.2	25-50	New Jersey, USA	Ehlenfeldt&Martin2002		I	1949
Coville	166	50	New Jersey, USA	Saftner et al. 2008		II	1949
Coville	109	25	Nova Scotia, Canada	Allan-Wojtas et al. 2001		I	1949
Croatan	119	NR	North Carolina, USA	Ballington and Rooks 2007 b	avgd from data	NR	1954
Croatan	133.4	25-50	New Jersey, USA	Ehlenfeldt&Martin2002		I	1954
Darrow	131.1	25-50	New Jersey, USA	Ehlenfeldt&Martin2002		I	1965
Dixi	107.8	25-50	New Jersey, USA	Ehlenfeldt&Martin2002		I	1936
Draper	163.7	7-10	Florida, USA	Yang et al. 2008		II	2004
Draper	223.29	NR	Oregon, USA	Brazelton and Wagner 2013		NR	2004
Draper	208	NR	Oregon, USA	Yang et al. 2014	grafted on rootstock	II	2004
Draper	223	NR	Oregon, USA	Brazelton and Wagner 2014 c		NR	2004
Draper	221	25	Oregon, USA	Strik et al. 2017	organic production	II	2004
Duke	169.4	7-10	Florida, USA	Yang et al. 2008		II	1987
Duke	154.4	25-50	New Jersey, USA	Ehlenfeldt&Martin2002	avgd from data	I	1987
Duke	167	50	New Jersey, USA	Saftner et al. 2008		II	1987
Duke	161.12	125	New Jersey, USA	Paylis 2004	multiple fertilization treatments, avgd from data	I	1987
Duke	207.6	180	Chile	Retamales et al. 2014	CPPU applied, avgd from data	II	1987
Duke	177.16	300	British Columbia, Canada	Ehret et al. 2012	multiple fertilization treatments, avgd from data	II	1987
Duke	148	NR	Oregon, USA	Brazelton and Wagner 2014 b		NR	1987
Duke	169	25	Chile	Lobos et al. 2016		II	1987
Duke	175	NR	New Zealand	Patel 2011		NR	1987
Duke	177	25	Oregon, USA	Strik et al. 2017	organic production	II	1987
Earliblue	143.4	25-50	New Jersey, USA	Ehlenfeldt&Martin2002		I	1952
Elizabeth	125.2	25-50	New Jersey, USA	Ehlenfeldt&Martin2002		I	1966
Elliot	138.9	7-10	Florida, USA	Yang et al. 2008		II	1973
Elliot	176.81	NR	Oregon, USA	Brazelton and Wagner 2015		II	1973
Elliot	114	25	Nova Scotia, Canada	Allan-Wojtas et al. 2001		I	1973
Elliot	273	50	Michigan, USA	Lobos et al. 2014	multiple treatments, conv unit	II	1973
Elliott	135.4	25-50	New Jersey, USA	Ehlenfeldt&Martin2002		I	1973
Elliott	164	50	New Jersey, USA	Saftner et al. 2008		II	1973
Elliott	134	50	Nova Scotia, Canada	Hicklenton et al. 2002	avgd from data	I	1973
Elliott	174.3	150	Oregon, USA	Almutairi et al. 2017	avgd from data	II	1973
Elliott	139.9	50	Oregon, USA	Strik and Buller 2012		II	1973
Hannah's Choice	186	50	New Jersey, USA	Saftner et al. 2008		II	2005
Harding	127.5	25-50	New Jersey, USA	Ehlenfeldt&Martin2002		I	1912
Hardyblue	113.8	25-50	New Jersey, USA	Ehlenfeldt&Martin2002		I	NA
Harrison	164.9	25-50	New Jersey, USA	Ehlenfeldt&Martin2002	avgd from data	I	1974
Heerma	120.6	25-50	New Jersey, USA	Ehlenfeldt&Martin2002		I	1983
Heintooga	176	NR	North Carolina, USA	Ballington and Bland 2017		II	2017
Herbert	80.4	25-50	New Jersey, USA	Ehlenfeldt&Martin2002		I	1952
Hortblue Poppins	240	NR	New Zealand	Patel 2011		NR	2011
Ivanhoe	115.8	25-50	New Jersey, USA	Ehlenfeldt&Martin2002		I	1951
Jersey	123.8	25-50	New Jersey, USA	Ehlenfeldt&Martin2002		I	1928
June	125.6	25-50	New Jersey, USA	Ehlenfeldt&Martin2002		I	1930
Katherine	132.1	25-50	New Jersey, USA	Ehlenfeldt&Martin2002		I	1920
Last Call	196.07	NR	Oregon, USA	Brazelton and Wagner 2015		II	2015
Lateblue	128.6	25-50	New Jersey, USA	Ehlenfeldt&Martin2002		I	1967
Lateblue	140	50	New Jersey, USA	Saftner et al. 2008		II	1967
Legacy	146.6	25-50	New Jersey, USA	Ehlenfeldt&Martin2002		I	1994
Legacy	186	100	Georgia, USA	NeSmith and Draper 2007		II	1994
Legacy	170	25	Oregon, USA	Strik et al. 2017	organic production	II	1994
Liberty	133.3	7-10	Florida, USA	Yang et al. 2008		II	2004
Liberty	321	50	Michigan, USA	Lobos et al. 2014	multiple treatments, conv unit	II	2004
Liberty	170	NR	Oregon, USA	Yang et al. 2014	grafted on rootstock	II	2004
Liberty	160.93	NR	Oregon, USA	Brazelton and Wagner 2014 a		NR	2004
Liberty	157	25	Oregon, USA	Strik et al. 2017	organic production	II	2004
Meader	151.9	25-50	New Jersey, USA	Ehlenfeldt&Martin2002		I	1971
Morrow	131	25-50	New Jersey, USA	Ehlenfeldt&Martin2002		I	1964
Murphy	105	25-50	New Jersey, USA	Ehlenfeldt&Martin2002		I	1950
Nelson	133.6	25-50	New Jersey, USA	Ehlenfeldt&Martin2002		I	1988
Northland	113.3	25-50	New Jersey, USA	Ehlenfeldt&Martin2002		I	1967
Nui	148.3	25-50	New Jersey, USA	Ehlenfeldt&Martin2002		I	1989
Nui	150	NR	New Zealand	Patel 2011		NR	1989
Olympia	112.3	25-50	New Jersey, USA	Ehlenfeldt&Martin2002		I	1933
Ozarkblue	160	25	Oregon, USA	Strik et al. 2017	organic production	II	1996
Patriot	194.5	480	Poland	Grajkowski et al. 2007	avgd from data	II	1976
Patriot	121.5	25-50	New Jersey, USA	Ehlenfeldt&Martin2002		I	1976
Patriot	197.25	200	Poland	Ochmian et al. 2010	avgd from data	II	1976
Pemberton	140.1	25-50	New Jersey, USA	Ehlenfeldt&Martin2002		I	1939
Pender	129.5	25-50	New Jersey, USA	Ehlenfeldt&Martin2002		I	1998
Pioneer	119.4	25-50	New Jersey, USA	Ehlenfeldt&Martin2002		I	1920
Premier	160	NR	North Carolina, USA	Ballington and Bland 2017		II
Puru	128.7	25-50	New Jersey, USA	Ehlenfeldt&Martin2002		I	1989
Rancocas	136.3	25-50	New Jersey, USA	Ehlenfeldt&Martin2002		I	1926
Reka	153.8	25-50	New Jersey, USA	Ehlenfeldt&Martin2002		I	1989
Reka	168	NR	New Zealand	Patel 2011		NR	1989
Reka	149	25	Oregon, USA	Strik et al. 2017	organic production	II	1989
Robeson	118	NR	North Carolina, USA	Ballington and Bland 2017		II	2009
Rubel	136.3	25-50	New Jersey, USA	Ehlenfeldt&Martin2002		I	1912
Scammel	156.4	25-50	New Jersey, USA	Ehlenfeldt&Martin2002	avgd from data	I	1931
Sierra	151.2	25-50	New Jersey, USA	Ehlenfeldt&Martin2002		I	1988
Sierra	245	150	Poland	Ochmian et al. 2009	Various growth substrates, avgd from data	II	1988
Spartan	132.4	25-50	New Jersey, USA	Ehlenfeldt&Martin2002		I	1977
Stanley	124.1	25-50	New Jersey, USA	Ehlenfeldt&Martin2002		I	1930
Sunrise	128.4	25-50	New Jersey, USA	Ehlenfeldt&Martin2002		I	1988
Top Shelf	223	NR	Oregon, USA	Brazelton and Wagner 2014 c		NR	2014
Toro	133.7	25-50	New Jersey, USA	Ehlenfeldt&Martin2002		I	1987
Wareham	108.3	25-50	New Jersey, USA	Ehlenfeldt&Martin2002		I	1936
Weymouth	124.1	25-50	New Jersey, USA	Ehlenfeldt&Martin2002		I	1936
Weymouth	151	50	New Jersey, USA	Saftner et al. 2008		II	1936
Wolcott	114.9	25-50	New Jersey, USA	Ehlenfeldt&Martin2002		I	1950
Vaccinium ashei (Rabbiteye)
Cultivar	Result average	# of berries Phenotyped	Location	Reference	Notes	Firmtech v.	Realease Year
Brightwell	181	75	Georgia, USA	NeSmith et al. 2000	hand harvested	II	1983
Brightwell	141	75	Georgia, USA	NeSmith et al. 2000	machine harvested	II	1983
Brightwell	214.6	24	Georgia, USA	NeSmith et al. 2005		II	1983
Brightwell	197.5	24	Georgia, USA	Nunez-Barrios et al. 2005	avgd from data, hand harvested	II	1983
Brightwell	123	24	Georgia, USA	Nunez-Barrios et al. 2005	avgd from data, machine harvested	II	1983
Climax	184.4	20	Mississipi, USA	Stringer et al. 2013		II	1974
Climax	183.4	24	Georgia, USA	NeSmith et al. 2005		II	1974
Columbus	119.5	NR	North Carolina, USA	Ballington and Rooks 2009	avgd from data	NR	2002
Powderblue	167.8	24	Georgia, USA	NeSmith et al. 2005		II	1978
Premier	167	50	Georgia, USA	Li et al. 2011	hand harvested	II	1978
Premier	122	50	Georgia, USA	Li et al. 2012	machine harvested	II	1978
Premier	163.9	24	Georgia, USA	NeSmith et al. 2005		II	1978
Premier	118.5	NR	North Carolina, USA	Ballington and Rooks 2009	avgd from data	NR	1978
Robeson	106.5	NR	North Carolina, USA	Ballington and Rooks 2009	avgd from data	NR	2009
Tifblue (Virgatum)	194.3	24	Georgia, USA	NeSmith et al. 2005		II	1955
Tifblue (Virgatum)	209.5	24	Georgia, USA	Nunez-Barrios et al. 2005	avgd from data, hand harvested	II	1955
Tifblue (Virgatum)	136.5	24	Georgia, USA	Nunez-Barrios et al. 2005	avgd from data, machine harvested	II	1955
Tifblue (Virgatum)	145	NR	North Carolina, USA	Ballington and Rooks 2009	avgd from data	NR	1955
Yadkin	178.2	24	Georgia, USA	NeSmith et al. 2005		II	1997
Montgomery	176	50	New Jersey, USA	Saftner et al. 2008		II	1997
Notes
We only included studies that measured firmness 0 to 24h after harvest
If multiple times points are included, we used only the first one
The number of berries measured is considered the total number of averaged measurements
Only released cultivars included

## Sheet: Ehlenfeldt&Martin2002
Cultivar	Type	release	Avg	1998	1999	2000
St. Cloud	HH	1990	115.3	NA	115	113.2
Friendship	HH	1992	118.5	NA	122.1	107.1
Polaris	HH	1996	151.1	NA	146.5	154.5
Ornablue	HH/VP	1969	129	NA	141.5	117.2
Herbert	NHB	1952	80.4	79.1	91.5	73.4
Atlantic	NHB	1939	98.8	89.2	109.9	100.1
Cabot	NHB	1920	103.1	112.1	NA	93.7
Concord	NHB	1928	103.7	97.6	109.8	106.1
Murphy	NHB	1950	105	96.2	NA	114.1
Dixi	NHB	1936	107.8	104.6	109.9	111.5
Wareham	NHB	1936	108.3	107.7	121.6	98.4
Olympia	NHB	1933	112.3	126.8	100	112.9
Northland	NHB	1967	113.3	105.6	121.2	114.7
Hardyblue	NHB	NA	113.8	124.7	110.4	108.5
Wolcott	NHB	1950	114.9	107.3	129.8	110.5
Ivanhoe	NHB	1951	115.8	131.3	106.1	114.2
Pioneer	NHB	1920	119.4	107.7	134.8	118.5
Heerma	NHB	1983	120.6	NA	129.9	111.8
Patriot	NHB	1976	121.5	121.3	126	118.6
Bluejay	NHB	1978	121.5	123.8	122.8	118.7
Jersey	NHB	1928	123.8	130	112.8	131
Weymouth	NHB	1936	124.1	124.8	117.2	133.1
Stanley	NHB	1930	124.1	123.6	121.3	129.2
Elizabeth	NHB	1966	125.2	110.3	137.6	116.8
June	NHB	1930	125.6	121.1	135.9	121.2
Blueray	NHB	1955	125.9	110.3	135.9	135.4
Bluetta	NHB	1967	127.2	143.3	119.8	122.3
Harding	NHB	1912	127.5	NA	126.5	126.6
Sunrise	NHB	1988	128.4	128.4	137.7	121.6
Lateblue	NHB	1967	128.6	130.4	156.3	103.6
Puru	NHB	1989	128.7	146.6	113.9	128.2
Pender	NHB	1998	129.5	130.4	126.5	134
Angola	NHB	1951	130	132.9	154.1	107.9
Ama	NHB	1983	130.2	NA	125.1	131
Berkeley	NHB	1949	130.3	111.5	152.6	129.8
Morrow	NHB	1964	131	147.1	127.8	120.8
Darrow	NHB	1965	131.1	138.9	139.4	117.7
Bluechip	NHB	1979	132	133.5	143.4	123.3
Katherine	NHB	1920	132.1	NA	160.3	103.7
Spartan	NHB	1977	132.4	148	127.9	124.8
Bluecrop	NHB	1952	133.3	155.1	139.1	109.6
Croatan	NHB	1954	133.4	134.5	142.2	126.9
Nelson	NHB	1988	133.6	141.8	146	114.4
Toro	NHB	1987	133.7	136.5	137.5	129.4
Elliott	NHB	1973	135.4	136.2	149.9	120.6
Chanticleer	NHB	1997	135.5	139.6	130.9	140.3
Bonus	NHB	NA	135.8	127.7	132.8	146
Rubel	NHB	1912	136.3	117.7	165.8	129.3
Rancocas	NHB	1926	136.3	131.3	142.1	137.9
Collins	NHB	1959	138.1	157.9	130.6	129.6
Bluegold	NHB	1989	138.6	147.2	143.5	130.4
Pemberton	NHB	1939	140.1	141.9	154.6	126.1
Bounty	NHB	1987	142.1	163.3	NA	121.7
Earliblue	NHB	1952	143.4	173.9	130.4	124.3
Legacy	NHB	1994	146.6	149.2	145.5	132.2
Nui	NHB	1989	148.3	156.6	150.4	145.6
Sierra	NHB	1988	151.2	173.5	148.9	130.7
Meader	NHB	1971	151.9	164.5	147.2	146.8
Burlington	NHB	1939	153.5	182.8	152.8	131
Reka	NHB	1989	153.8	154.6	145.1	163.7
Chandler	NHB	1994	154	170.2	152.2	144.7
Coville	NHB	1949	154.2	148.2	175.8	142.3
Duke	NHB	1987	154.4	173.1	152.6	140.5
Scammel	NHB	1931	156.4	NA	160.6	150.1
Brigitta Blue	NHB	1977	159.7	188	150.2	145.9
Bluehaven	NHB	1967	161.4	173.5	161.8	151.7
Harrison	NHB	1974	164.9	156.7	184	158.7
Little Giant	PRO	1995	127.8	111.8	127.6	146.7
Georgiagem	SHB	1987	119.9	127.1	128.8	106.4
Sampson	SHB	1998	122.2	138	107	125.5
Blue Ridge	SHB	1987	129.4	131	NA	126.1
Cape Fear	SHB	1987	131.5	141.3	NA	120.9
Jubilee	SHB	1994	138.1	162.3	118.3	137.3
Sharpblue	SHB	1976	143.3	152	146.3	133.6
Magnolia	SHB	1994	146.1	114.2	163.8	165.3
O’Neal	SHB	1987	148.6	143.7	155.4	148.8
Ozarkblue	SHB	1996	153.2	147.4	169.9	144.3
Gulfcoast	SHB	1987	153.5	160.3	148.7	155.1
Summit	SHB	1998	154	NA	170.4	136.3
Star	SHB	1996	155.9	181.3	145.3	158.5
Marimba	SHB	1992	169	175.6	164.8	169.1
Reveille	SHB	1990	169.3	185.9	174.7	150.5
Avonblue	SHB	1977	172.2	195	161	163.8
Cooper	SHB	1987	174.5	184.5	184.2	157.6
Bladen	SHB	1990	184.7	193.9	184	NA
Misty	SHB	1989	186.7	188.8	208.3	162.7
Pearl River	SHB/RE	1994	189	225	196.7	176.5

## Sheet: Saftneretal2008
Cultivar	Compression force (N)	Type	Year of release	Origin
Chanticleer	1.56	NHB	1997	NJ-USDA
Duke	1.67	NHB		NJ-USDA
Hannah's Choice	1.86	NHB
Weymouth	1.51	NHB
Berkeley	1.54	NHB
Bluecrop	1.64	NHB
Bluegold	1.71	NHB
Coville	1.66	NHB
Elliott	1.64	NHB
Lateblue	1.4	NHB
Coastal	1.37	NHB
Montgomery	1.76	NHB

## Sheet: Ehlebfeldt2000
Cultivar	Firmness (g.mm-1)	Type	Year of release	State
Chanticleer	142	NHB	1997	USDA
Weymouth	126	NHB
Duke	146	NHB
Bluecrop	116	NHB
